# Supplementary material for: Solvent- and initiator-free fabrication of efficient and stable perovskite-polystyrene surface-patterned thin films for LED backlights
Source: Royal Society of Chemistry journal article supplement (doi:10.1039/d0nr08759a), 2021-01-01
Supplement: d0nr08759a1.pdf [file d0nr08759a1.pdf]

## Electronic Supplementary Information

### Solvent- and Initiator-free Fabrication of Efficient and Stable Perovskite-Polystyrene Surface-Patterned Thin Films for LED Backlights

Shuangshuang Shi, Liya Cao, Heng Gao, Zhongzhi Tian, Wengang Bi, Chong Geng\*, Shu Xu\*

Tianjin Key Laboratory of Electronic Materials and Devices, School of Electronics and Information Engineering, Hebei University of Technology, 5340 Xiping Road, Tianjin 300401, P. R. China.

\* Corresponding authors. E-mail: Chong Geng: gengchong@hebut.edu.cn; Shu Xu: shu.xu@hebut.edu.cn.

**Table S1** Optical properties and stability of PNC-polymer composite films obtained with different fabrication methods.

| Preparation method        | Perovskite              | Polymer | Polymerization time | Emission peak (nm) | FWHM (nm) | PLQY (%) | Stability [keep% / time]                                | Ref.      |
|---------------------------|-------------------------|---------|---------------------|--------------------|-----------|----------|---------------------------------------------------------|-----------|
| Electrospinning           | CsPbBr <sub>3</sub> NCs | PS      | 50°C 2 h            | 513                | 24        | 48       | 70% / 192 h, in water                                   | 1         |
| Swelling-diswelling       | MAPbBr <sub>3</sub> NCs | PS      | 30°C -80°C, 2-8 h   | 532                | 18        | 34       | 65% / 5h, 100°C, in water                               | 2         |
| In situ polymerization    | CsPbBr <sub>3</sub> NCs | PS      | 14 h                | -                  | -         | 44       | 81.8% / 24h, in water                                   | 3         |
| Electrospinning           | CsPbBr <sub>3</sub> NCs | PS      | -                   | 516                | 23        | 23       | 40% / 6h, under 405 nm LED;<br>83% / 3 months, in water | 4         |
| In situ recrystallization | CsPbBr <sub>3</sub> NCs | PS      | 12 h                | 523                | -         | 0.7      | -                                                       | 5         |
| Swelling-diswelling       | CsPbBr <sub>3</sub> NCs | PS      | 24 h                | 519                | -         | 43       | Stable / 5 h, under 365 nm LED                          | 6         |
| Electrospinning           | CsPbBr <sub>3</sub> NCs | PMMA    | -                   | 515                | 22        | 23.5     | 30% / 6h, under 405 nm LED;<br>50% / 3 months, in water | 4         |
| In situ polymerization    | CsPbBr <sub>3</sub> NCs | PMMA    | 2 h                 | 524                | 21        | 32.7     | 91%/7 days, in water                                    | 7         |
| In situ recrystallization | CsPbBr <sub>3</sub> NCs | PVDF    |                     | 537                | 16        | 30       | 90%/48h, Under UV light                                 | 8         |
| In situ recrystallization | CsPbBr <sub>3</sub> NCs | EVA     |                     | 527                | 19.7      | 40.5     | 54%/18h, under 460 nm LED                               | 9         |
| In situ hot injection     | CsPbBr <sub>3</sub> NCs | PS      | 3-5 h               | 530                | 20        | 90       | 94% / 240 h, in water;<br>91.7%/ 100h, under 460 nm LED | This work |

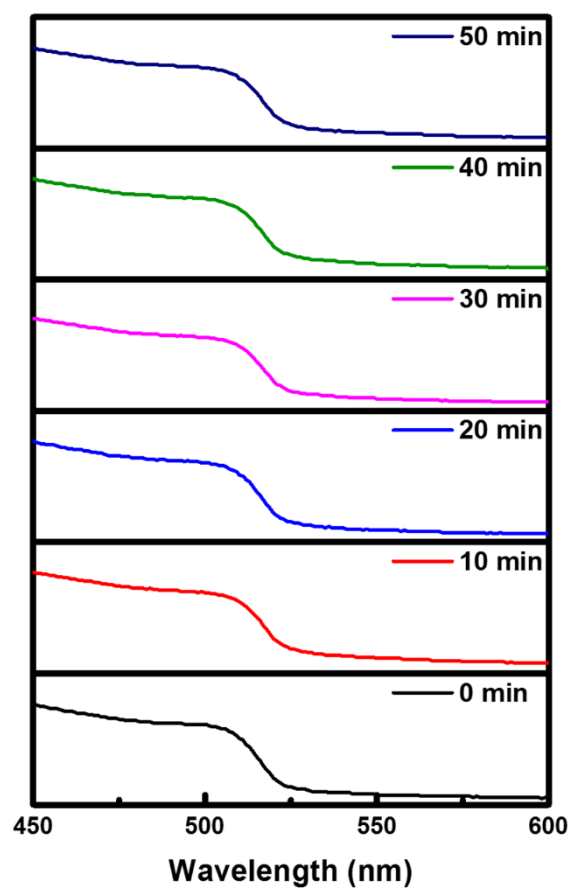

**Fig. S1** UV-Vis absorption spectra of PNCs synthesized in styrene.

**Table S2** PL decay data of PNC-styrene/PS mixture.

| Sample                                        | $A_1$   | $T_1$<br>(ns) | $A_2$  | $T_2$<br>(ns) | $T_{ave}$ (ns) |
|-----------------------------------------------|---------|---------------|--------|---------------|----------------|
| Fresh synthesized PNC-styrene solution        | 2461.28 | 4.278         | 768.04 | 12.310        | 8.077          |
| PNC-PS complex (heating treatment for 50 min) | 2545.54 | 4.301         | 753.05 | 12.686        | 8.208          |

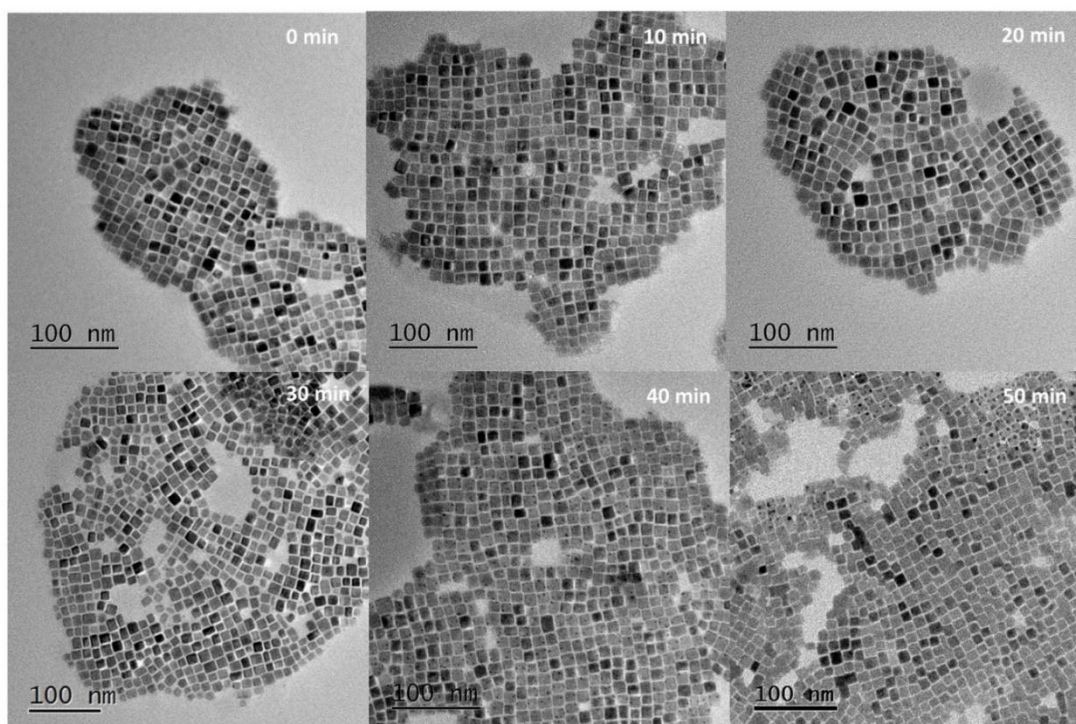

**Fig. S2** TEM images of PNCs collected during the pre-polymerization process (synthesized in styrene).

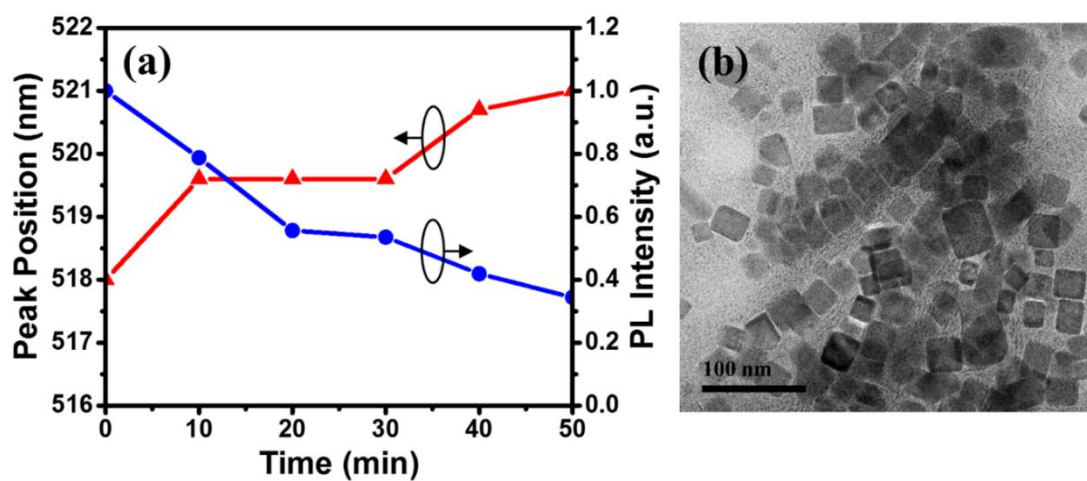

**Fig. S3** (a) Peak position and PL intensity of PNCs collected during the pre-polymerization process (synthesized in ODE). (b) TEM image of PNCs obtained after heating treatment in ODE for 50 minutes.

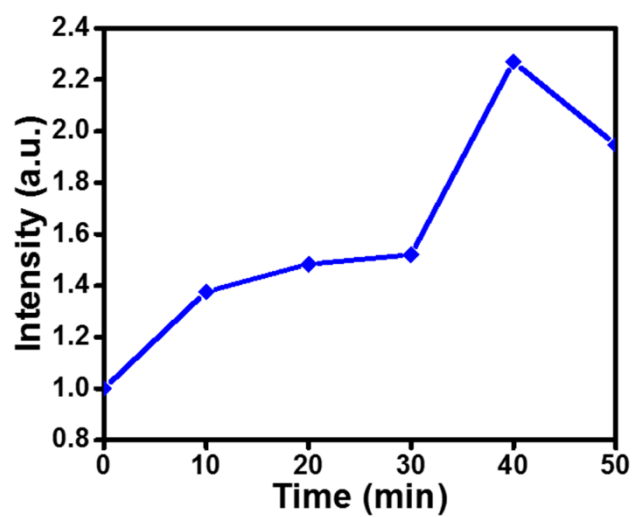

Fig. S4 Time-dependent intensity ratio of the peak at  $698\text{ cm}^{-1}$  to  $720\text{ cm}^{-1}$  in Fig. 4b.

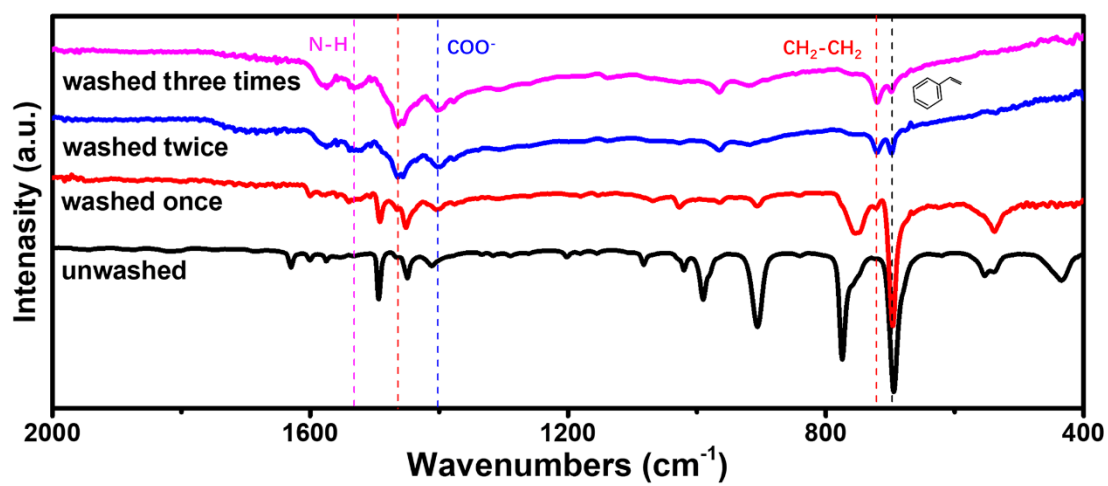

Fig. S5 FTIR spectra of the PNC powders after washing different times.

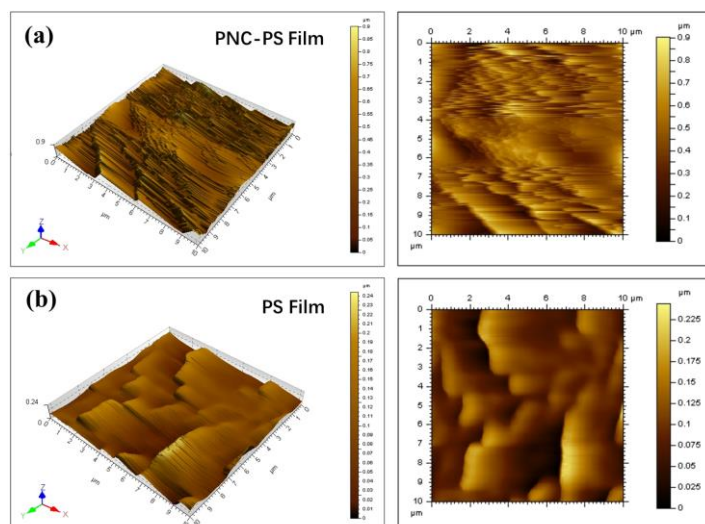

**Fig. S6** AFM image of PNCs-PS film made by one pot synthesis method (Film 1) and pure PS film.

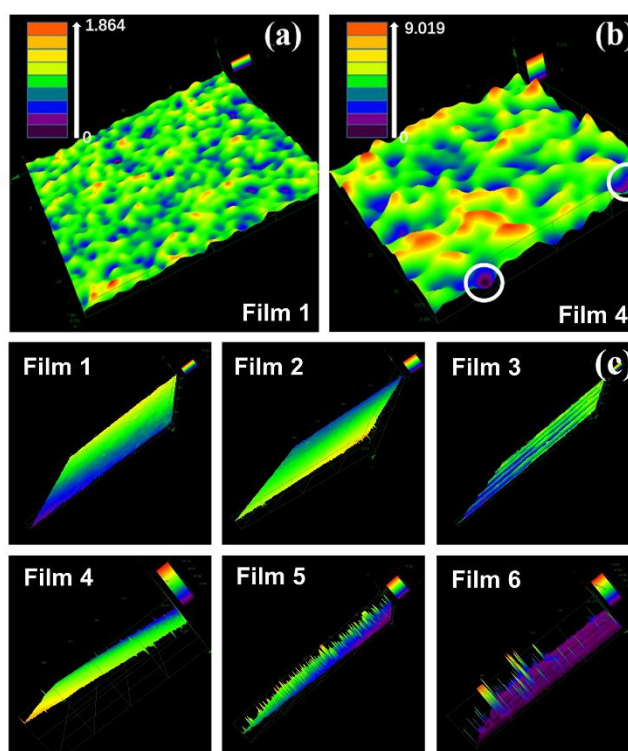

**Fig. S7** 3D depth-of-field microscope photos of PNCs-PS film made by one pot synthesis method (Film 1) (a), and directly mix PNCs with PS in toluene (Film 4) (b). Other PNC-PS films in (c) include: Films 2 and 3 (synthesized by one-pot method followed by initiator-assisted thermal polymerization and UV polymerization), Films 5 and 6 (synthesized in ODE and re-dispersed in styrene, followed by initiator-assisted thermal polymerization and UV polymerization), The unit of the scale is set as micrometer.

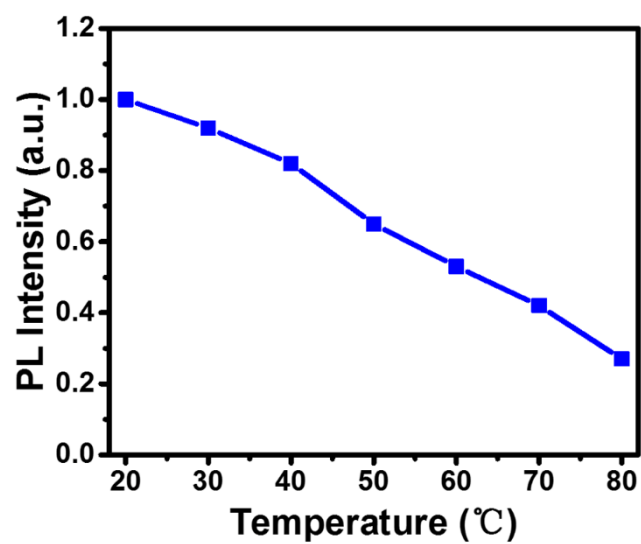

**Fig. S8** Thermal quenching of traditional PNC powders synthesized in ODE.

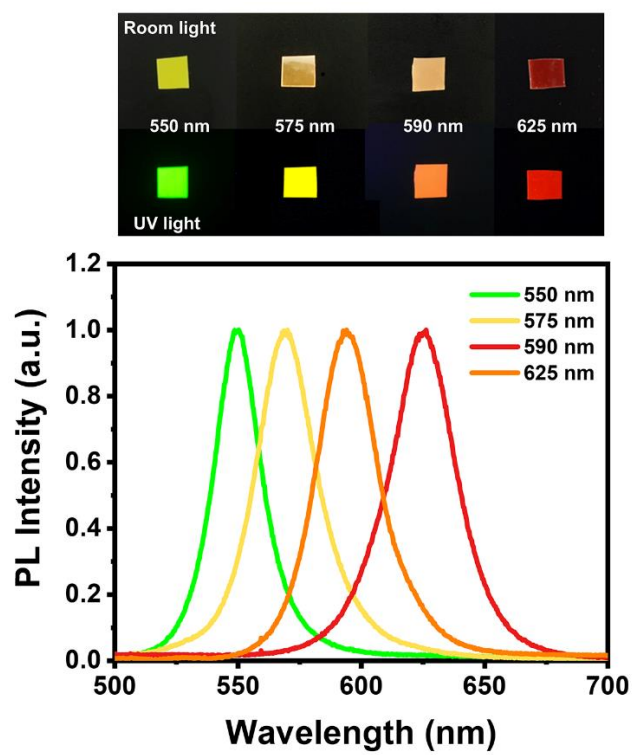

**Fig. S9** Pictures of PNC-PS films under room light and UV light, and the corresponding PL spectra.

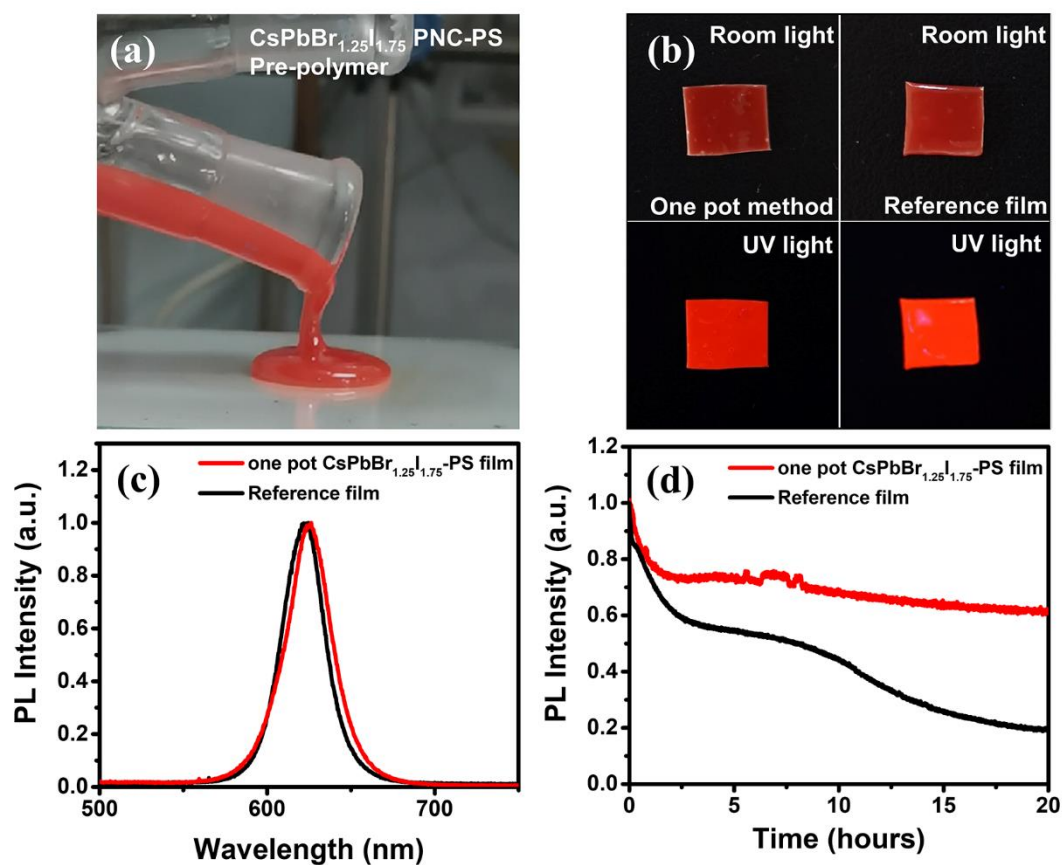

**Fig. S10** Pictures of red emission PNCs-PS prepolymer (a) and films (b) made by one pot synthesis method (left) and directly mix PNCs with PS in toluene (right). PL spectra (c) and stability trend (d) of the red emission PNC- PS composite film made by one pot synthesis method (red) and directly mix PNCs with PS in toluene (black).

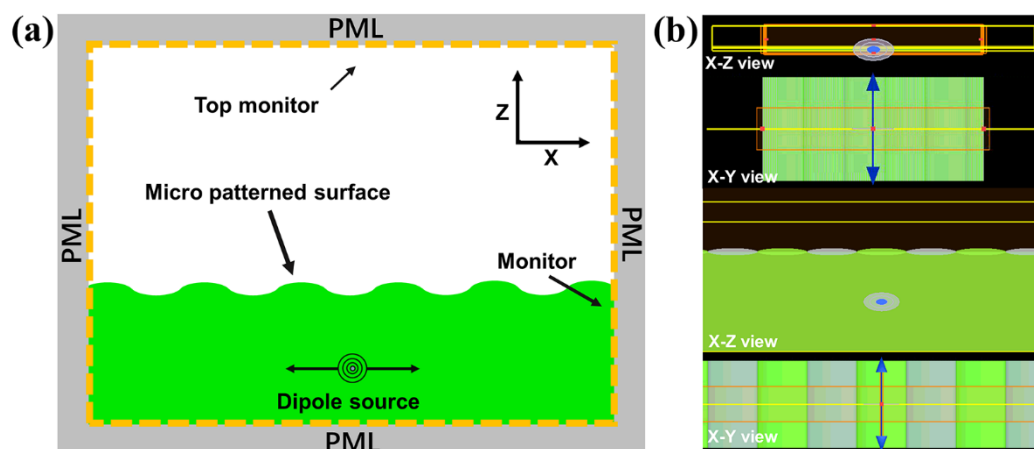

**Fig. S11** (a) A schematic diagram of FDTD simulation model for micropatterned film. (b) the simulation model on X-Z view and X-Y view. The two pictures above are the overall view and the other two pictures below are the zoomed-in view.

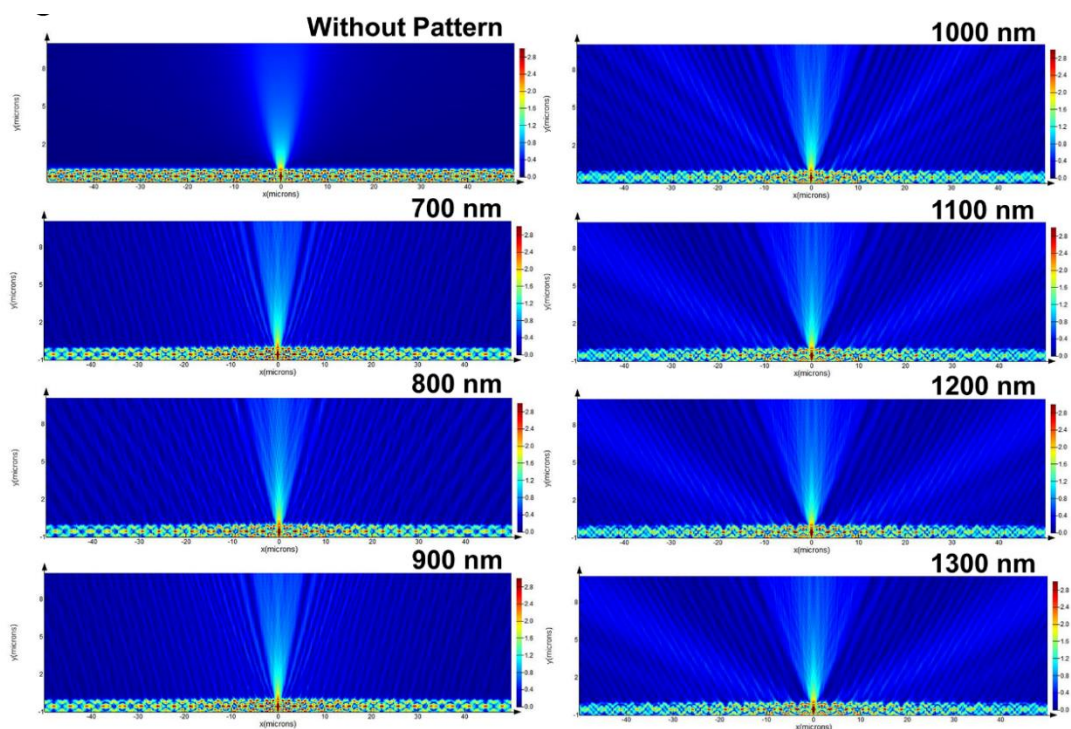

**Fig. S12** The cross-sectional view of electromagnetic field about the PNC-PS film with different period pattern.

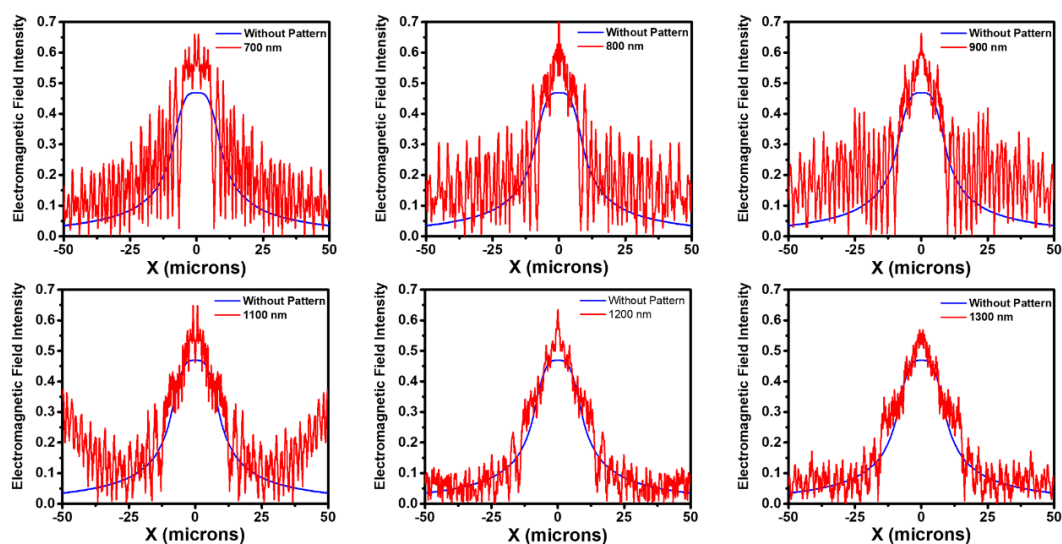

**Fig. S13** The electromagnetic field intensity about the PNC-PS film with different period pattern.

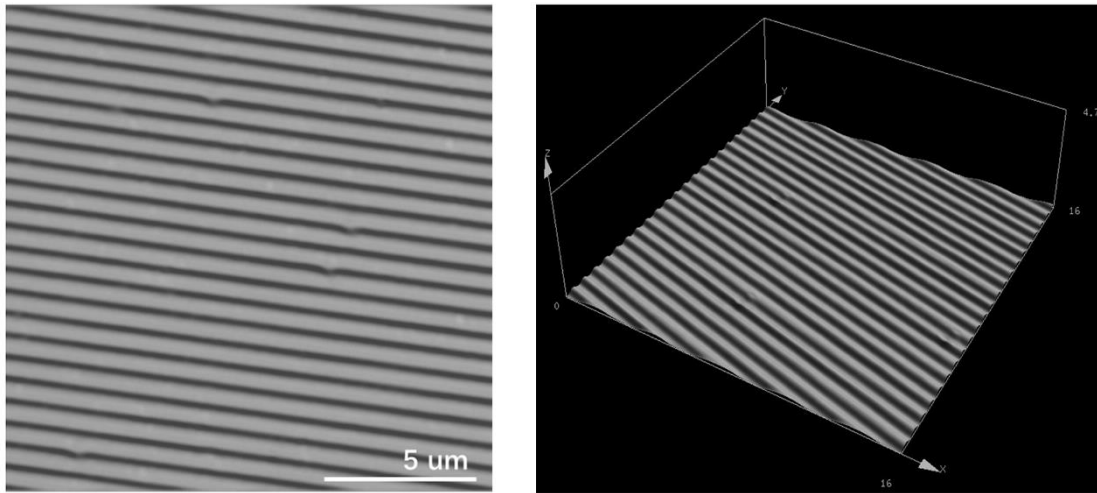

**Fig. S14** Top (left) and 3D (right) view of the PDMS template.

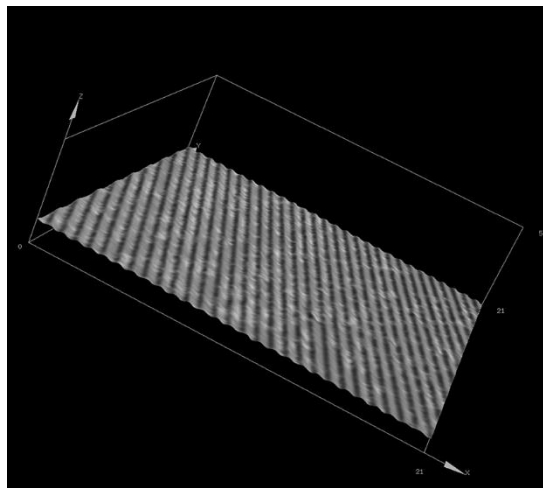

**Fig. S15** 3D surface view of the micropatterned film.

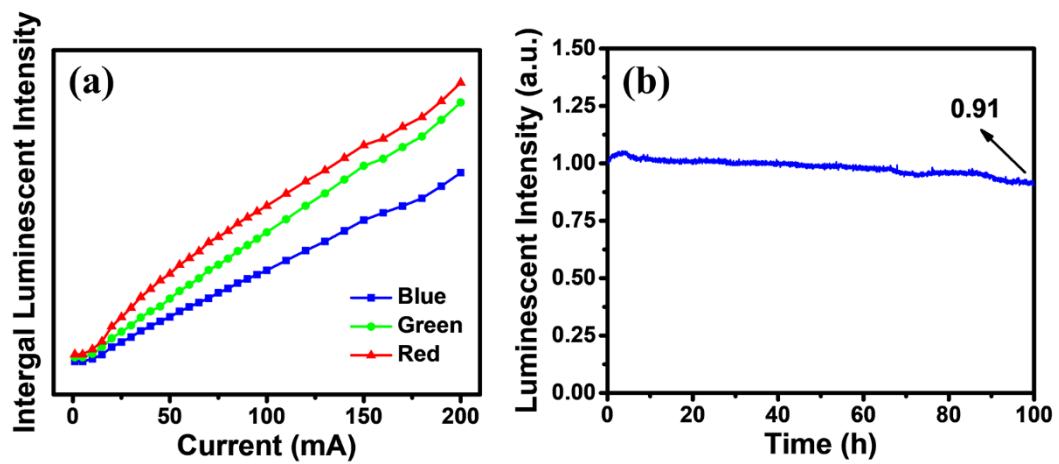

**Fig. S16** (a) The spectral integral ratio of blue, green and red under different drive currents. (b) Luminous stability of the backlight sample under continuously operate.

## Reference

- 1 H. Liao, S. Guo, S. Cao, L. Wang, F. Gao, Z. Yang, J. Zheng and W. Yang, *Adv. Opt. Mater.* 2018, **6**, 1800346.
- 2 Y. Wang, J. He, H. Chen, J. Chen, R. Zhu, P. Ma, A. Towers, Y. Lin, A. J. Gesquiere, S. T. Wu and Y. Dong, *Adv. Mater.* 2016, **28**, 10710-10717.
- 3 Y. C. Wong, J. De Andrew Ng and Z. K. Tan, *Adv. Mater.* 2018, **30**, 1800774.
- 4 D. H. Jiang, Y. H. Tsai, L. Veeramuthu, F. C. Liang, L. C. Chen, C. C. Lin, T. Satoh, S. H. Tung and C. C. Kuo, *APL Mater.* 2019, **7**, 111105.
- 5 Y. Xin, H. Zhao and J. Zhang, *ACS Appl. Mater. Interfaces*, 2018, **10**, 4971-4980.
- 6 J. Liu, J. Zhou, H. Lin, Y. Yu, S. Zuo and B. Li, *Chem. Eur. J.* 2020, **26**, 10528.
- 7 Y. Cai, Y. Li, L. Wang and R. Xie, *Adv. Opt. Mater.*, 2019, **7**, 1901075.
- 8 P. Liang, P. Zhang, A. Pan, K. Yan, Y. Sheng, M. Yang and L. He, *ACS Appl. Mater. Interfaces*, 2019, **11**, 22786-22793.
- 9 Y. Li, Y. Lv, Z. Guo, L. Dong, J. Zhen, C. Chai, N. Chen and Y. Lu, *ACS Appl. Mater. Interfaces*, 2018, **10**, 15888-15894.
